# Supplementary material for: Deoxygenation of stearic acids using alkaline treated beta molecular sieves assisted by microwave irradiation
Source: Royal Society of Chemistry journal article supplement (doi:10.1039/d1cy00019e), 2021-01-01
Supplement: d1cy00019e1.pdf [file d1cy00019e1.pdf]

1     **Deoxygenation of Stearic Acids using Alkaline Treated Beta Molecular Sieves**  
2                                     **Assisted by Microwave Irradiation**

3     Yuxiang Liu<sup>a\*</sup>, Dejiang Zheng<sup>a</sup>, Shuo Tao<sup>b</sup>, Yuchao Lyu<sup>c</sup>, Xiaosheng Wang<sup>d</sup>, Xinchun Liu<sup>a</sup>,  
4                                     Shoukun Liu<sup>a</sup>, Ming Li<sup>e</sup>, Ruiyang Zhao<sup>a</sup>, Shitao Yu<sup>a,\*\*</sup>

5     <sup>a</sup> State Key Laboratory Base of Eco-chemical Engineering, College of Chemical Engineering, Qingdao University  
6     of Science and Technology, Qingdao, China

7     <sup>b</sup> College of Chemistry and Chemical Engineering, Shandong Provincial Key Laboratory of Chemical Energy  
8     Storage and Novel Cell Technology, Liaocheng University, Liaocheng, Qingdao, China

9     <sup>c</sup> State Key Laboratory of Heavy Oil Processing, China University of Petroleum-East China, Qingdao, China

10    <sup>d</sup> State Key Laboratory of Heavy Oil Processing, China University of Petroleum-Beijing, Beijing, China

11    <sup>e</sup> College of Chemistry and Pharmaceutical Sciences, Qingdao Agricultural University, Qingdao 266109, China

12

13

14

15

16

17

18

19

20

21

22

23

24

25

26

27

---

\* Corresponding author.

E-mail addresses: liuyx@qust.edu.cn (Y. Liu)

\*\* Corresponding author.

E-mail addresses: yushitaoqust@126.com (S. Yu)

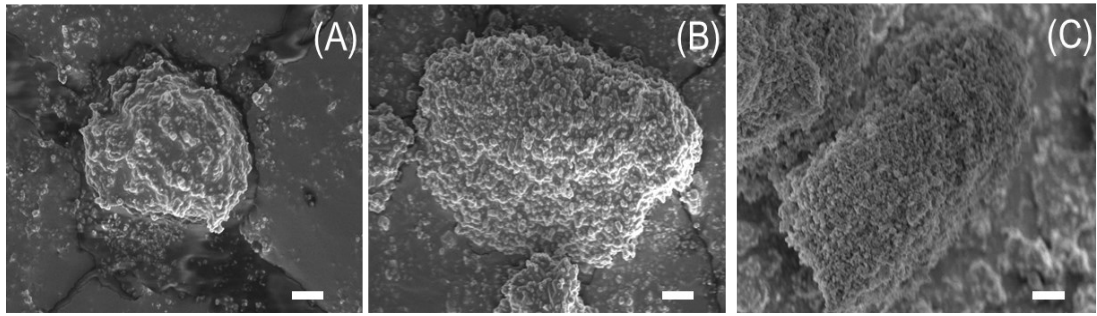

28  
29  
30  
31  
32  
33  
34  
35  
36  
37  
38  
39  
40  
41  
42  
43  
44  
45  
46  
47  
48  
49  
50  
51  
52  
53  
54  
55  
56  
57  
58  
59

**Figure S1 SEM images of Beta-1 (A), Beta-2 (B), and Beta-3 (C). Scale bar represents 1  $\mu\text{m}$ .**

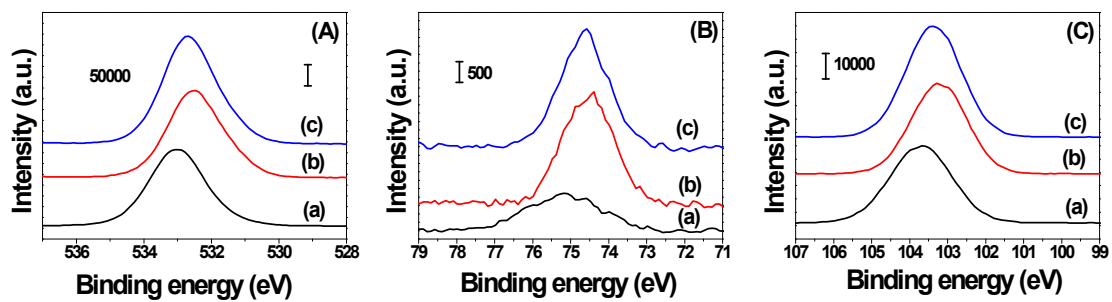

60

61 **Figure S2 O<sub>1s</sub> (A), Al<sub>2p</sub> (B), and Si<sub>2p</sub> (C) XPS spectra of Beta-1 (a), Beta-2 (b), and Beta-3 (c)**

62

63

64

65

66

67

68

69

70

71

72

73

74

75

76

77

78

79

80

81

82

83

84

85

86

87

88

89

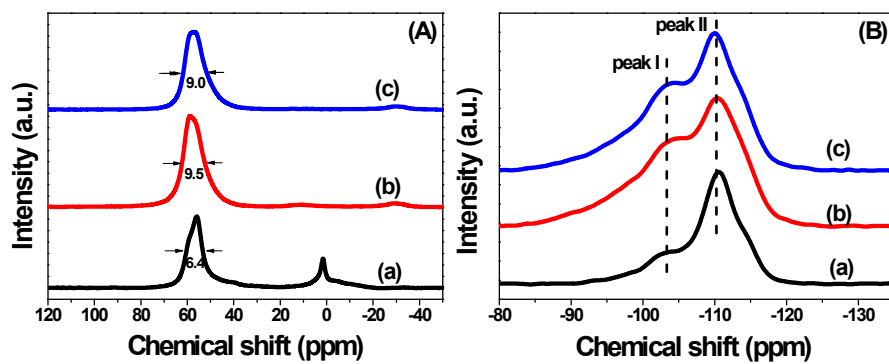

Figure S3  $^{27}\text{Al}$  and  $^{29}\text{Si}$  MAS NMR spectra of Beta-1 (a), Beta-2 (b), and Beta-3 (c)

90

91

92

93

94

95

96

97

98

99

100

101

102

103

104

105

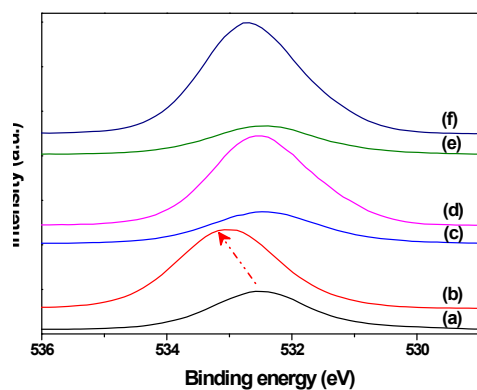

106

107 **Figure S4 XPS spectra of the O 1s core level for Beta-1 (a), Ni/Beta-1 (b), Beta-2 (c), Ni/Beta-**  
108 **2 (d), Beta-3 (e), and Ni/Beta-3 (f) samples recorded at room temperature. Notes: Spectra of**  
109 **(a), (c), and (e) are cited from Figure S2 (C). Spectra (a, c, and e) and (b, d, and f) were**  
110 **detected in two tests. Therefore, the intensity of spectra is different and spectra are**  
111 **employed to compare the binding energy.**

112

113

114

115

116

117

118

119

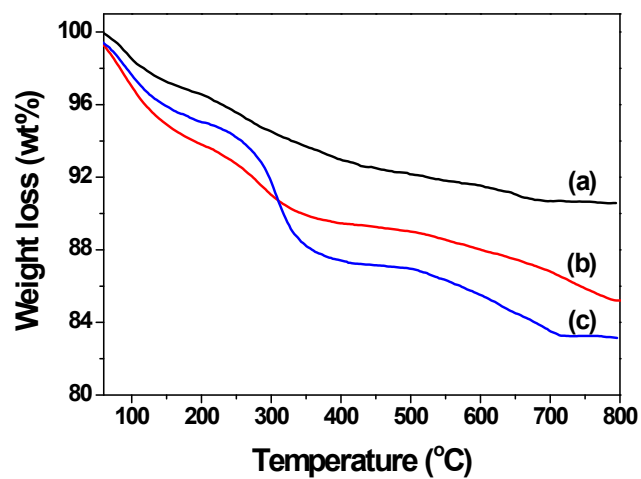

120

121 **Figure S5 TG curves of spent Ni/Beta-1 (a), Ni/Beta-2 (b), and Ni/Beta-3 (c) catalysts.**

122

123

124

125

126

127

128

129

130

131

132

133

134

135

136

137

Table S1 The composition of gas products

|           | methane(wt%) | ethane(wt%) | ethylene(wt%) | propane(wt%) |
|-----------|--------------|-------------|---------------|--------------|
| Ni/Beta-1 | 62%          | 12%         | 22%           | 4%           |
| Ni/Beta-2 | 33%          | 12%         | 22%           | 33%          |
| Ni/Beta-3 | 32%          | 13%         | 21%           | 34%          |

138

139

140

141

142

143

144

145

146

147

148

149

150

151

152

153

154

155

156

Table S2 Catalytic performance of catalysts in references

|    | Catalyst                                         | Reaction conditions        | Conversion (%) | C <sub>15-18</sub> selectivity (%) | Iso-paraffin selectivity (%) | Ref |
|----|--------------------------------------------------|----------------------------|----------------|------------------------------------|------------------------------|-----|
| 1  | 5% Pt/ $\gamma$ -Al <sub>2</sub> O <sub>3</sub>  | T=375 °C, P=2 MPa, t=5 h   | 100            | 97                                 | <1                           | 1   |
| 2  | 4% Pd/C                                          | T=300 °C, P=1.7MPa, t=5h   | 100            | 98                                 | <1                           | 2   |
| 3  | 10% Ni/ $\gamma$ -Al <sub>2</sub> O <sub>3</sub> | T=330 °C, P=5MPa,          | 100            | 88                                 | <1                           | 3   |
| 4  | 7% Ni/SiO <sub>2</sub>                           |                            | 49             | 67                                 | 2                            | 4   |
| 5  | 7% Ni/ $\gamma$ -Al <sub>2</sub> O <sub>3</sub>  |                            | 91             | 88                                 | <1                           | 4   |
| 6  | 7% Ni/SAPO-11                                    | T=220 °C, P=2MPa, t=6 h    | 99             | 93                                 | 3                            | 4   |
| 7  | 7% Ni/H-ZSM-5                                    |                            | 99             | 53                                 | 11                           | 4   |
| 8  | 7% Ni/H-Y                                        |                            | 99             | 30                                 | 13                           | 4   |
| 9  | Ni/Al <sub>2</sub> O <sub>3</sub>                | T=360 °C, P=2 MPa, t=0.75h | 100            | 58                                 | 1                            | 5   |
| 10 | 4% Pd/C                                          | T=375 °C, P=1.5MPa, t=5 h  | 90             | 43                                 | <1                           | 6   |

158

159 [1] A. T. Madsen, E. H. Ahmed, C. H. Christensen, R. Fehrman and A. Riisager, *Fuel*, 2011, **90**,  
160 3433-3438.

161 [2] S. Lestari, I. Simakova, A. Tokarev, M. A. Päivi, E. Kari and D. Y. Murzin, *Catal. Lett.*, 2008,  
162 **122**, 247-251.

163 [3] R. Kaewmeesri, A. Srifa, V. Itthibenchapong and K. Faungnawakij, *Energ. Fuel.*, 2015, **29**,  
164 833-840.

165 [4] H. Zuo, Q. Liu, T. Wang, L. Ma, Q. Zhang and Q. Zhang, *Energ. Fuel.*, 2012, **26**, 3747-3755

166 [5] Q. B. Ayodele, Z. Gholami and Y. Uemura, *J. Energy. Chem.*, 158-168.

167 [6] B. H. Susanto, M. Nasikin, Sukirno and A. Wiyo, *Procedia. Chem.*, 2014, **9**, 139-150.

168

169
